# Supplementary material for: Detecting Endogenous Retrovirus-Driven Tissue-Specific Gene Transcription
Source: PubMed Central journal article supplement (PMC4419796; doi:10.1093/gbe/evv049), 2015-03-11

### Color Key

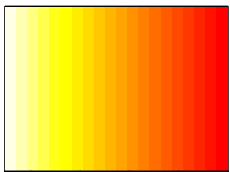

0.2      0.6      1

Value

# MLT1B.txt

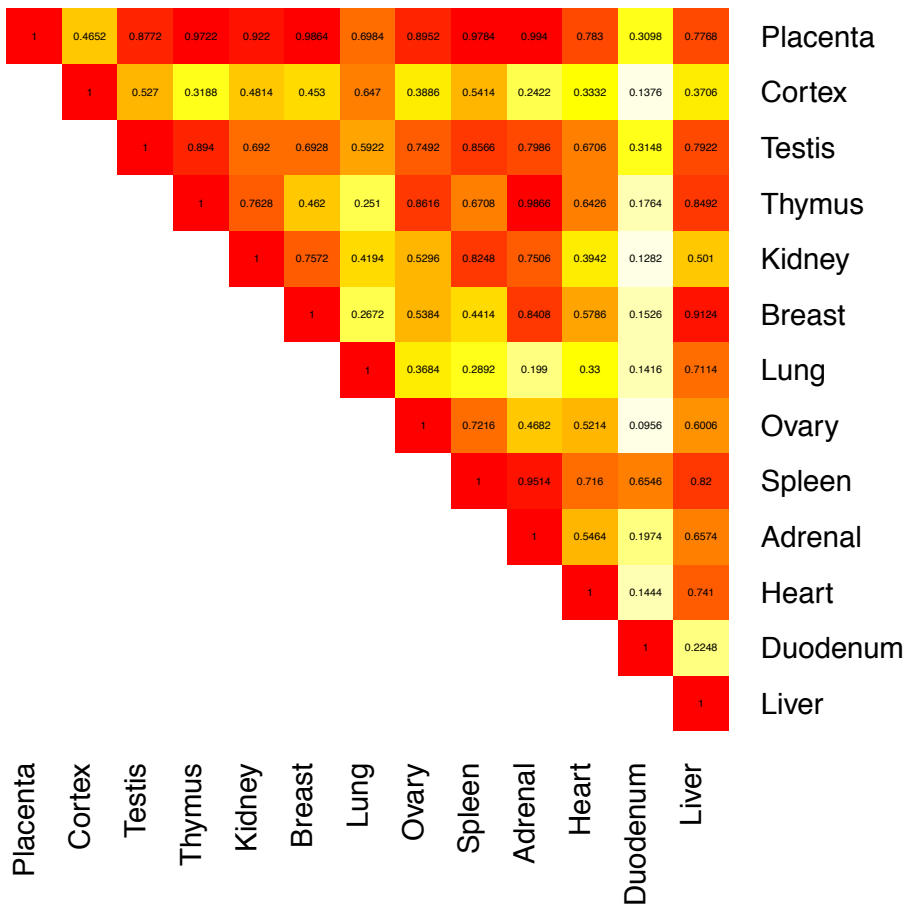













### Color Key

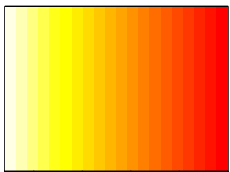

0.2      0.6      1

Value

# MLT1F1.txt

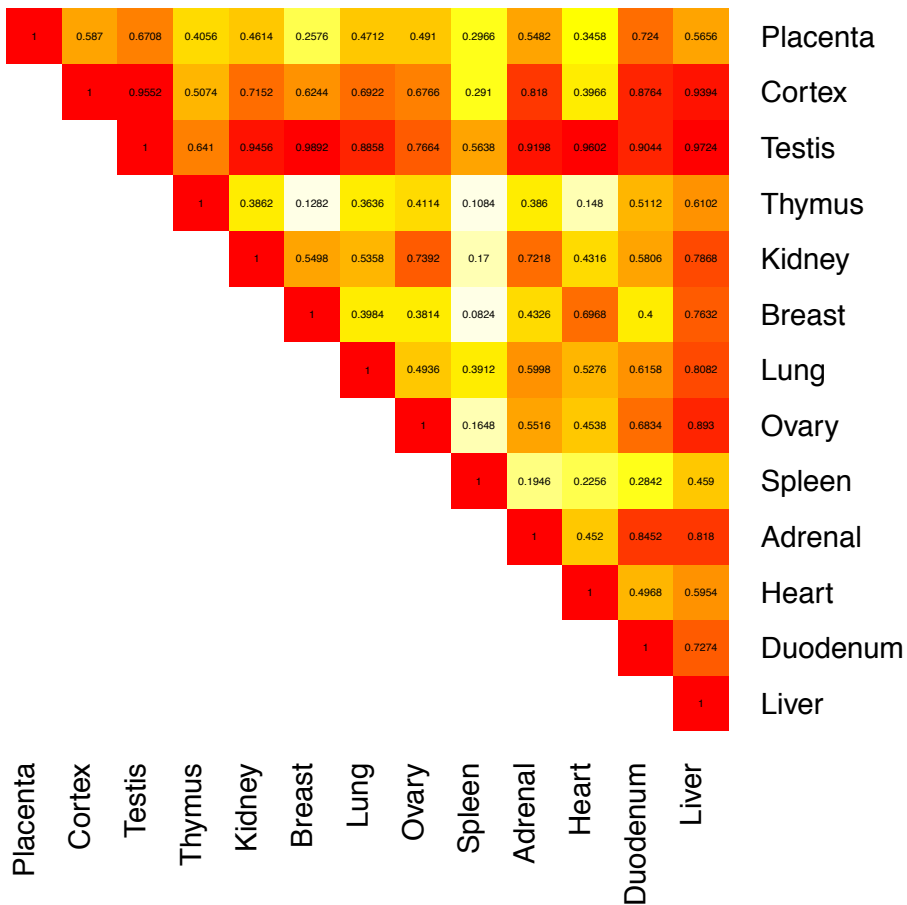

### Color Key

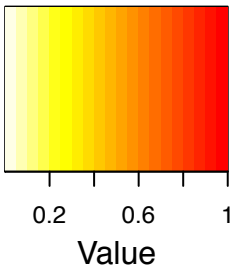

# MLT1F2.txt

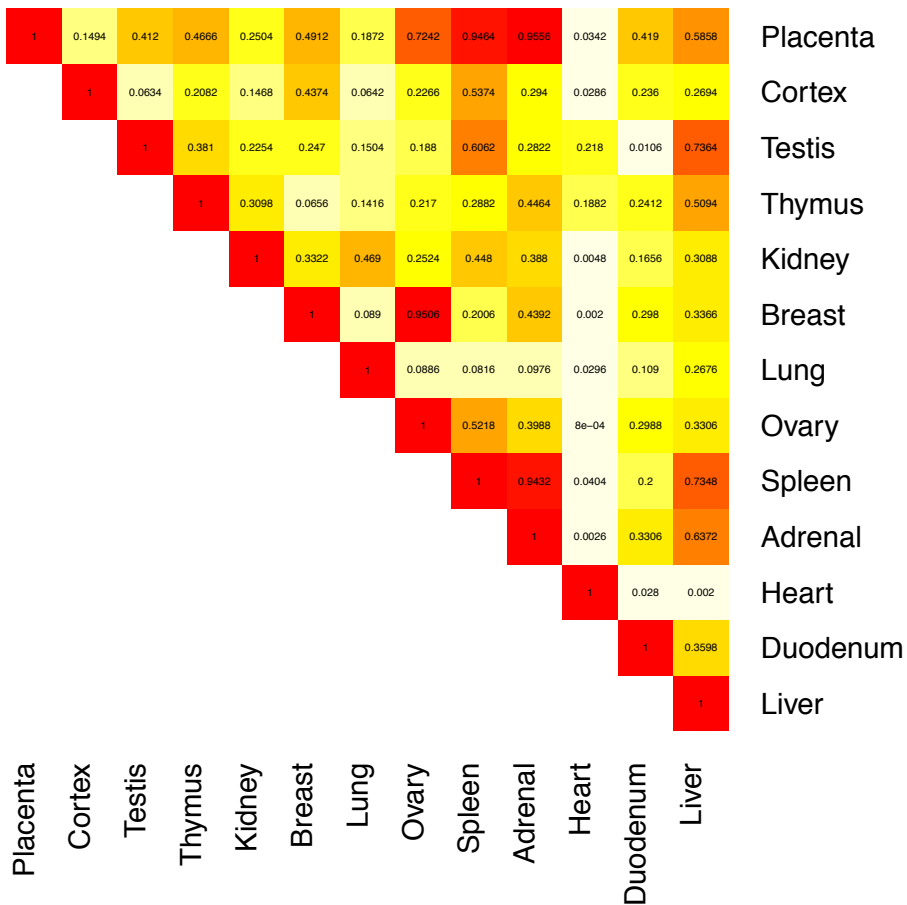

























### Color Key

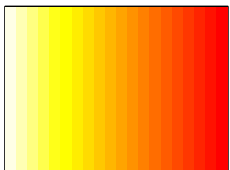

0.4 0.6 0.8 1

Value

# MLT1L.txt

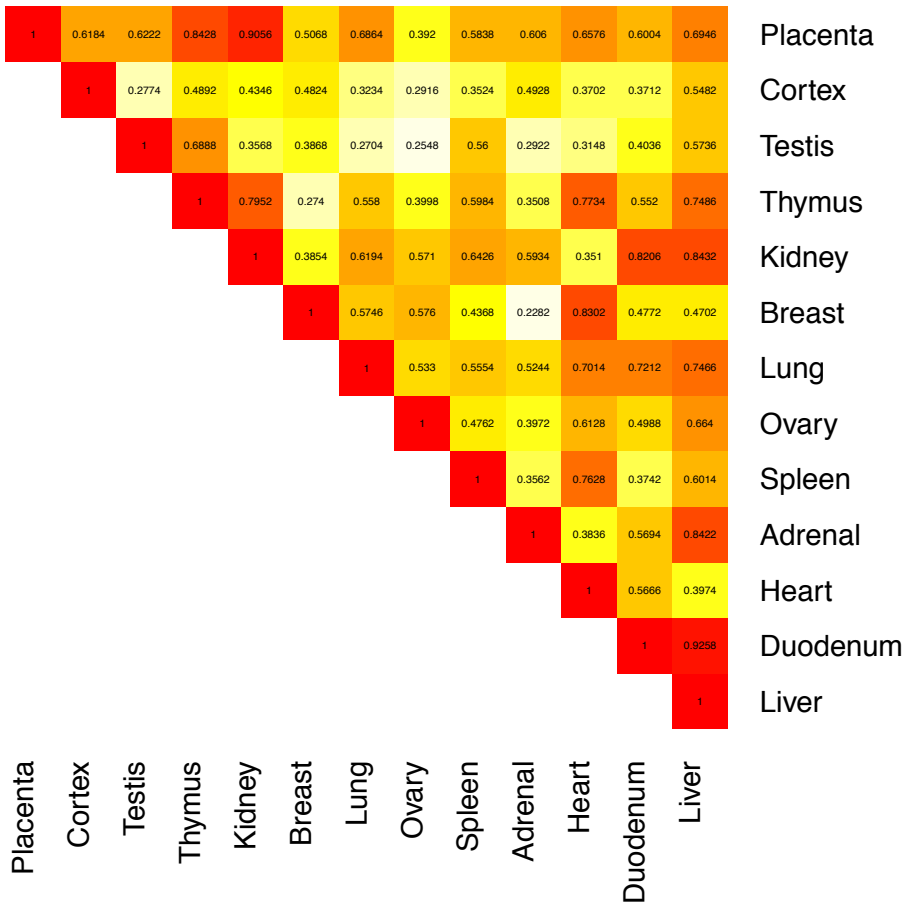





















### Color Key



0.2      0.6      1

Value

# MSTA.txt

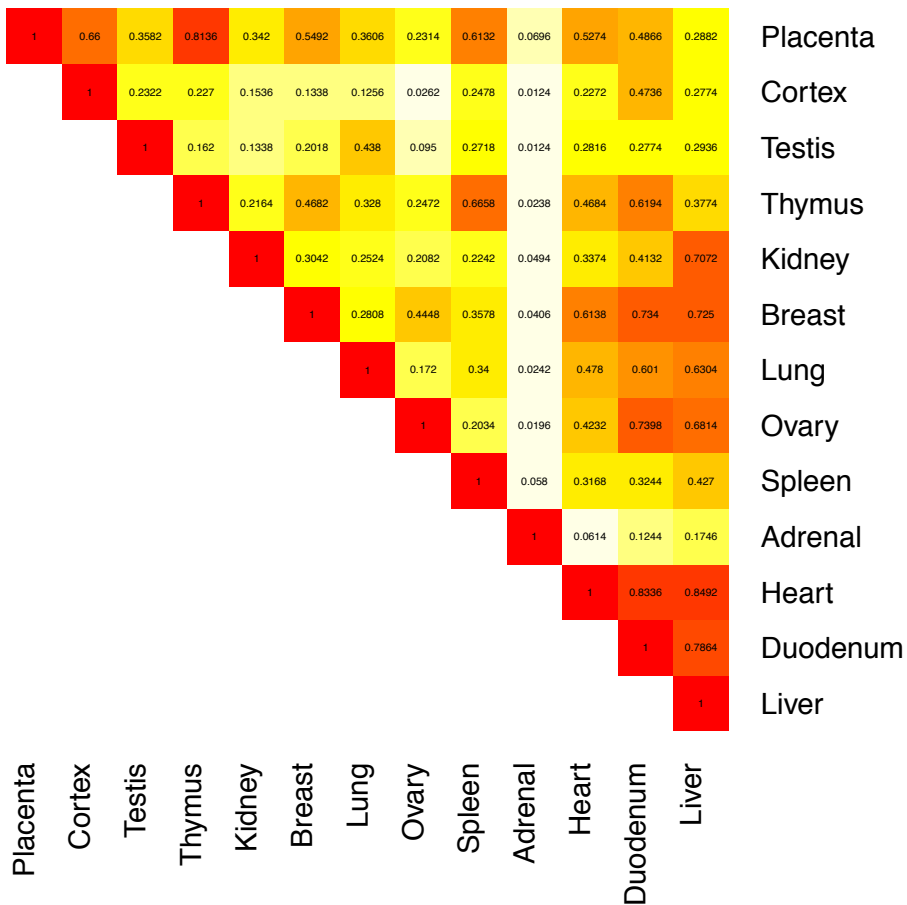

Supplement: supp_evv049_S2_TEPlots_Mouse.pdf [file supp_evv049_S2_TEPlots_Mouse.pdf]
