# Supplementary material for: Detecting Endogenous Retrovirus-Driven Tissue-Specific Gene Transcription
Source: PubMed Central journal article supplement (PMC4419796; doi:10.1093/gbe/evv049), 2015-03-11

### Color Key

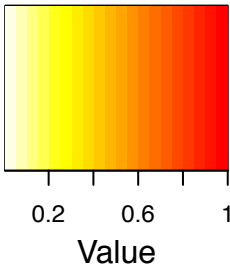

# LTR12C.txt

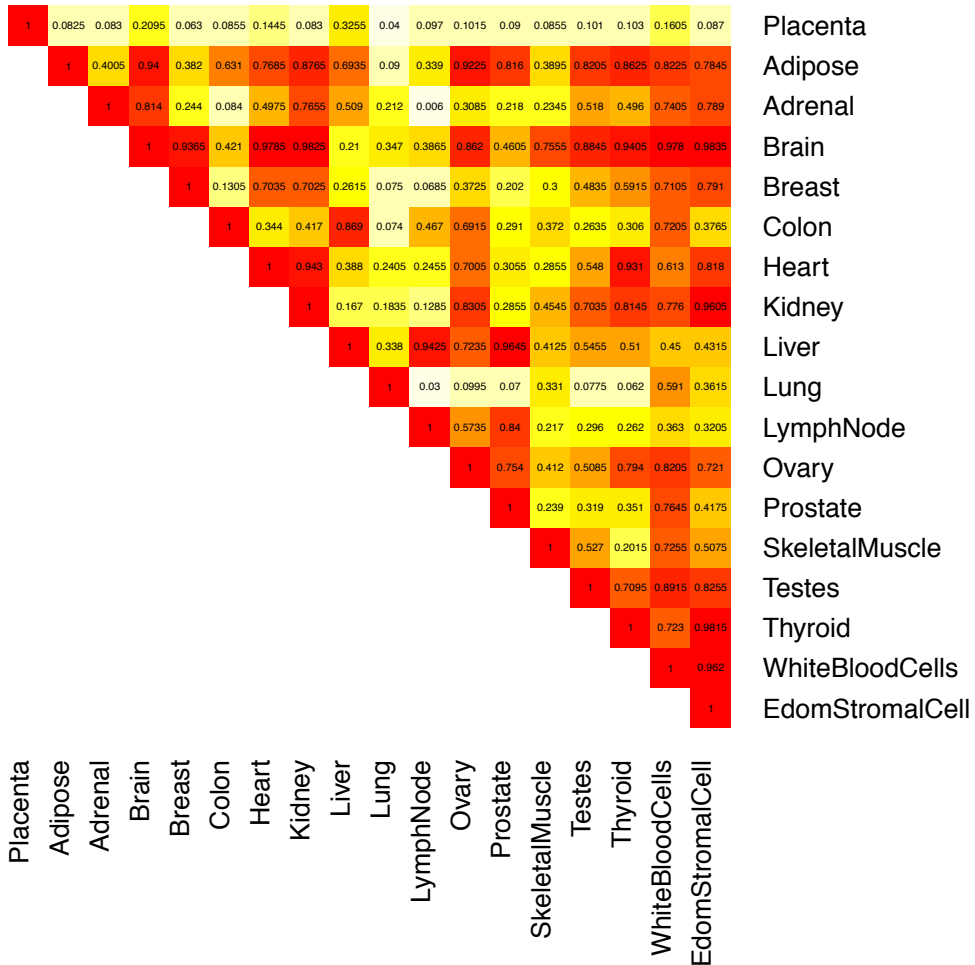









### Color Key

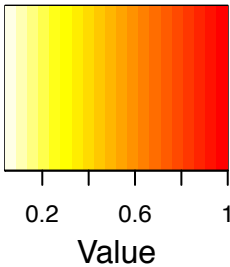

# LTR22B.txt

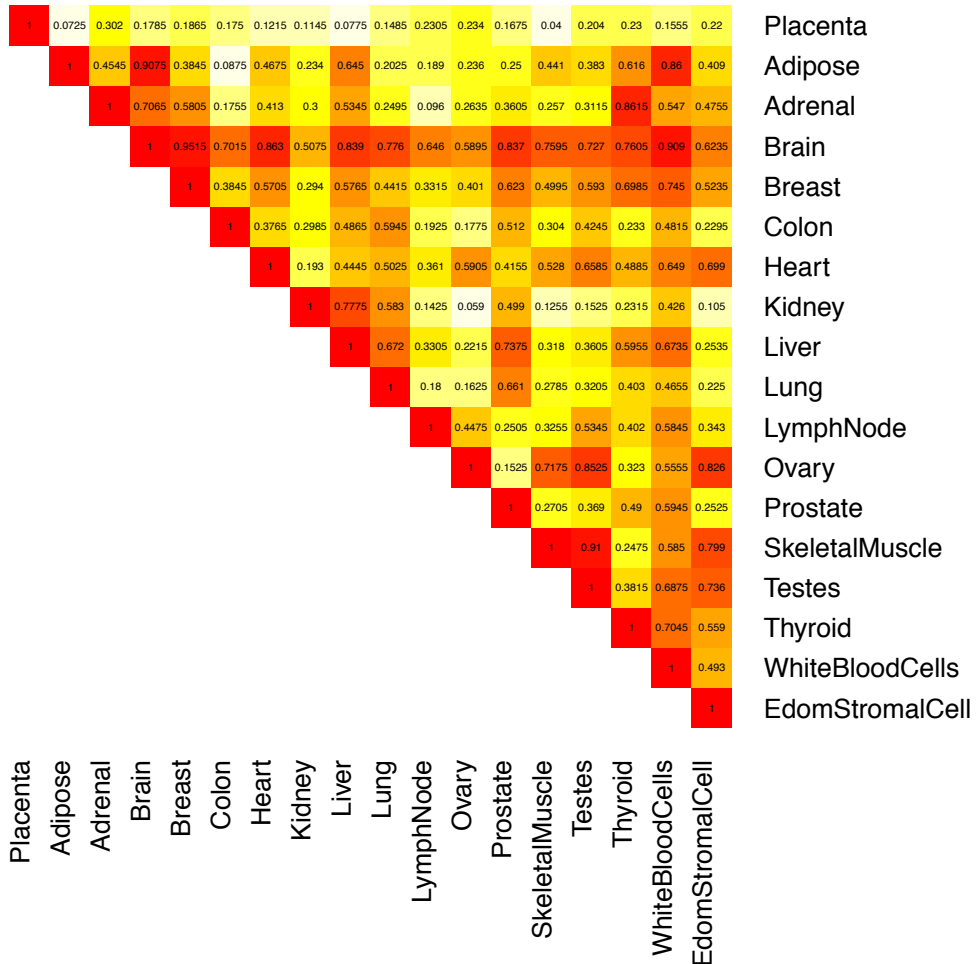



























































































### Color Key

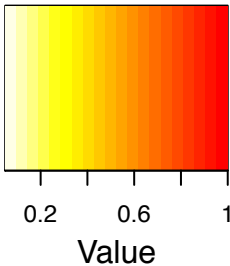

# MLT2B3.txt

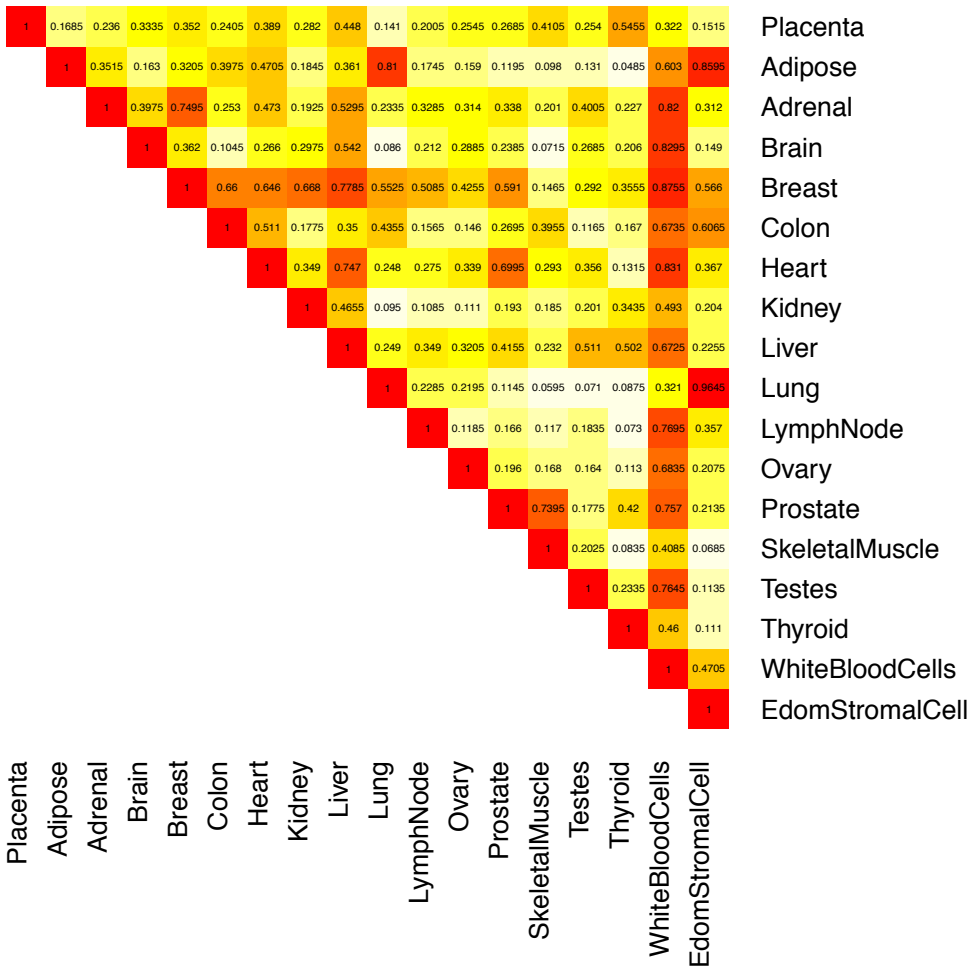

### Color Key

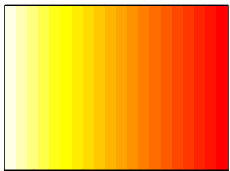

0.2      0.6      1

Value

# MLT2B4.txt

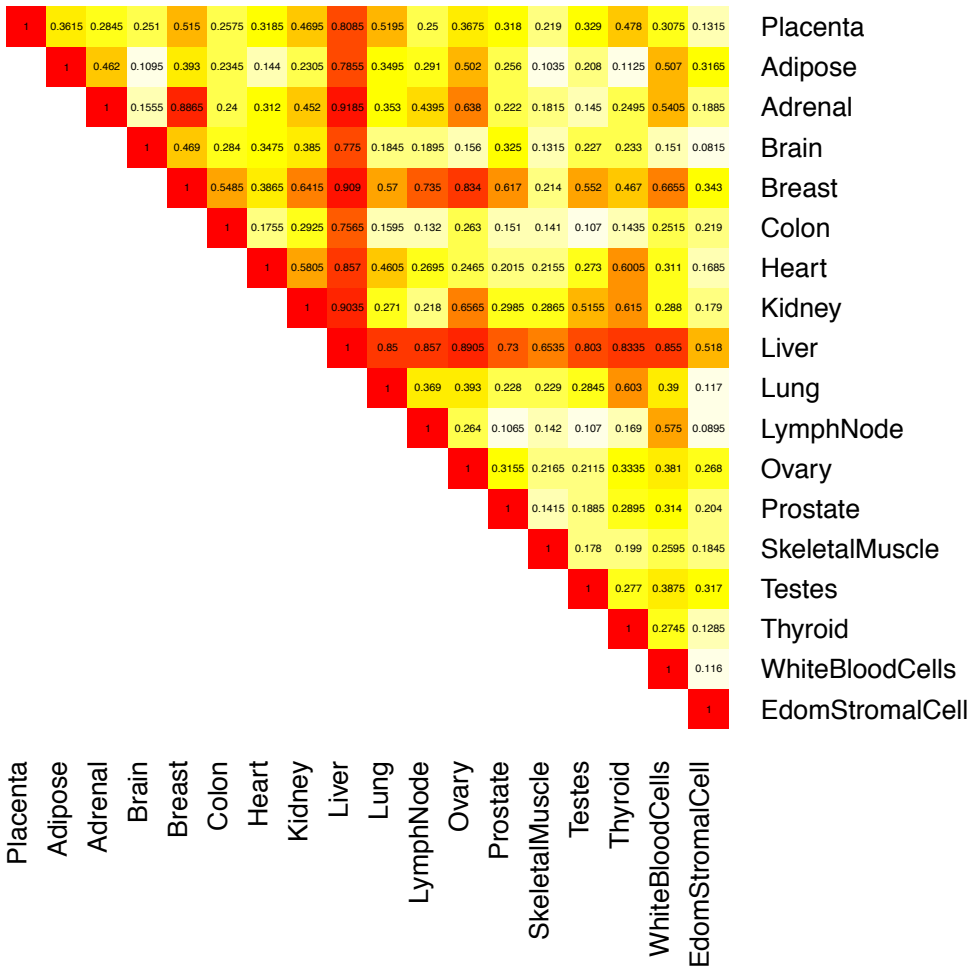

Supplement: supp_evv049_S3_TEPlots_20kb.pdf [file supp_evv049_S3_TEPlots_20kb.pdf]
