# Supplementary material for: Detecting Endogenous Retrovirus-Driven Tissue-Specific Gene Transcription
Source: PubMed Central journal article supplement (PMC4419796; doi:10.1093/gbe/evv049), 2015-03-11

### Color Key

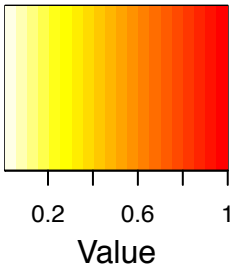

# LTR12C.txt

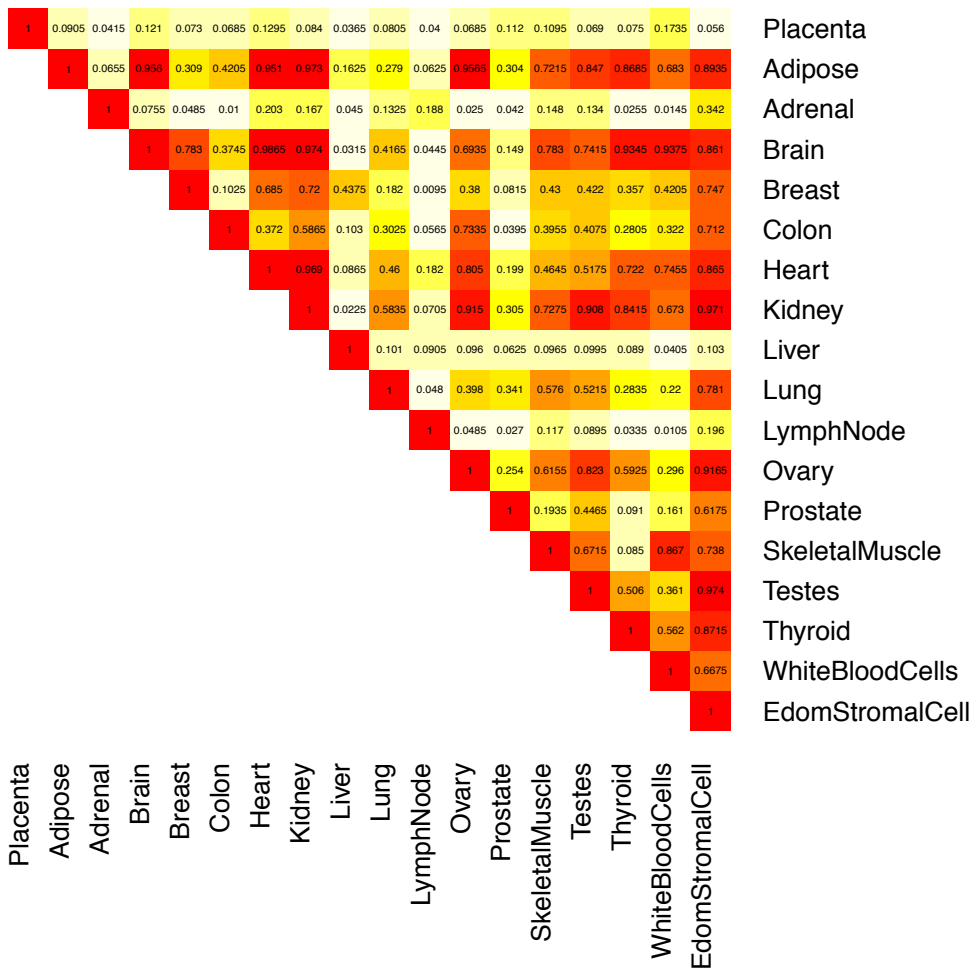































### Color Key

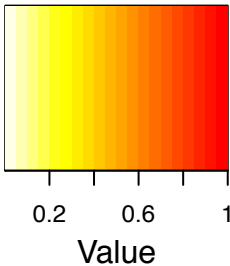

# MER39B.txt

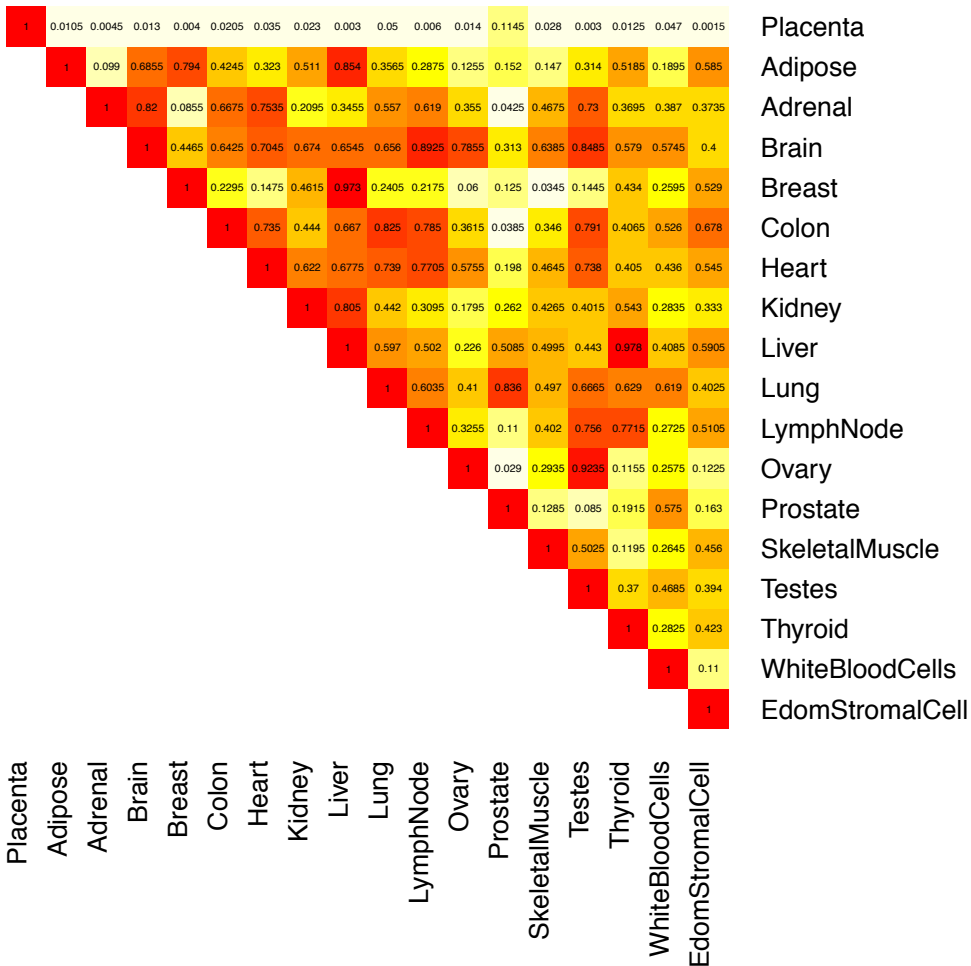





























### Color Key

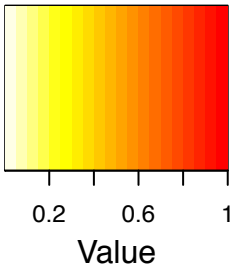

# MLT1F2.txt

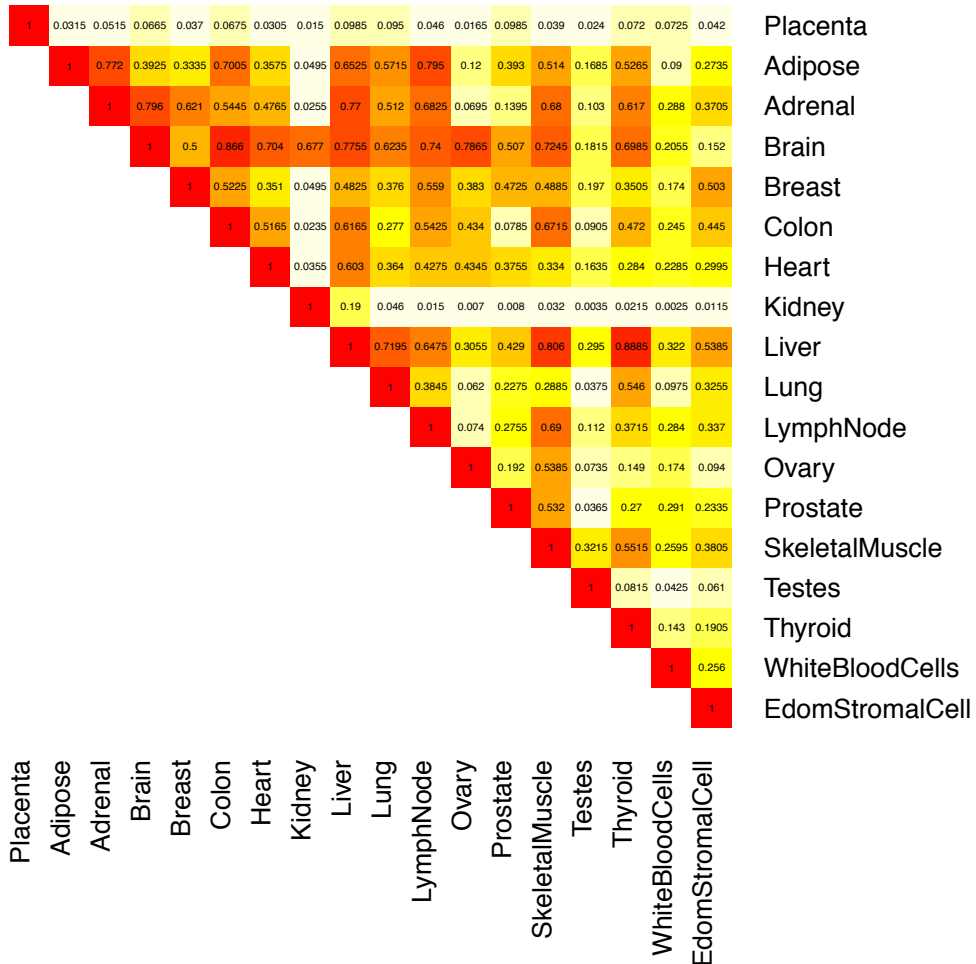





























### Color Key

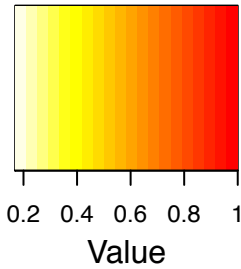

# MLT2A1.txt

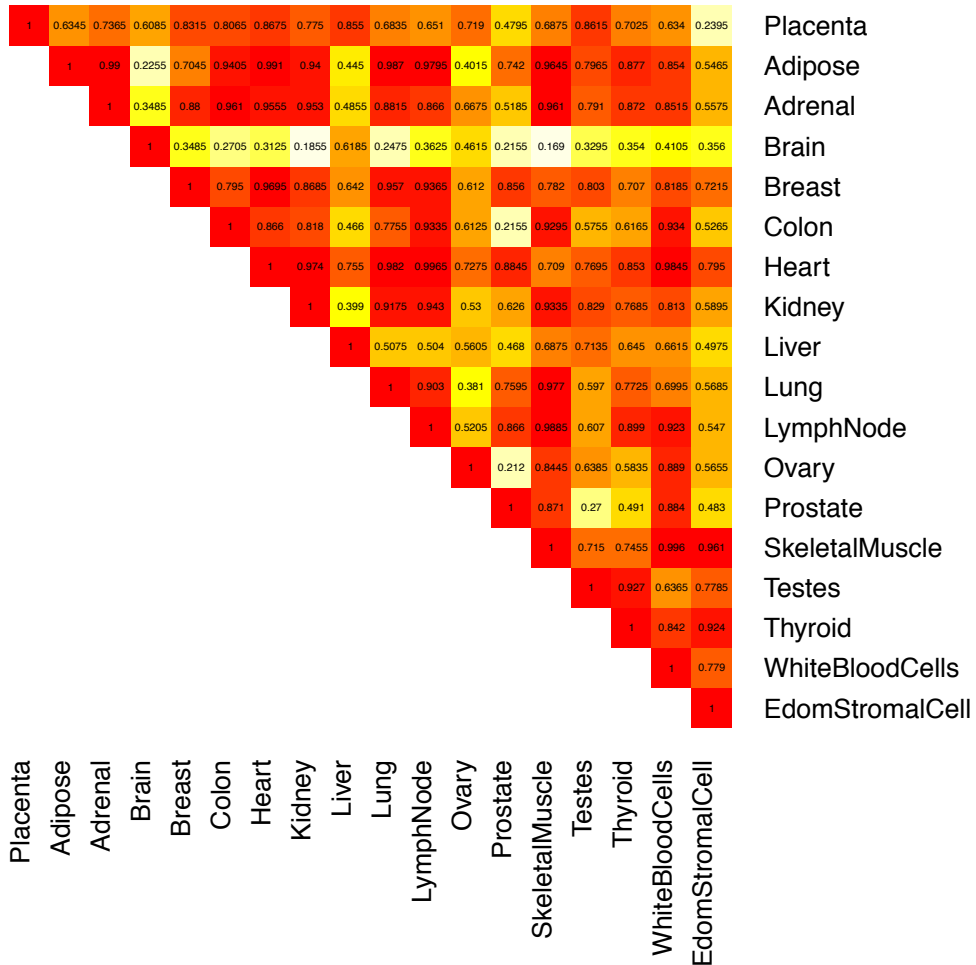

















### Color Key

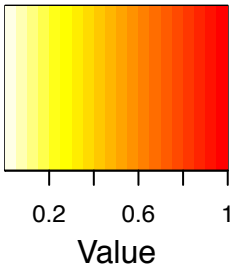

# MSTB.txt

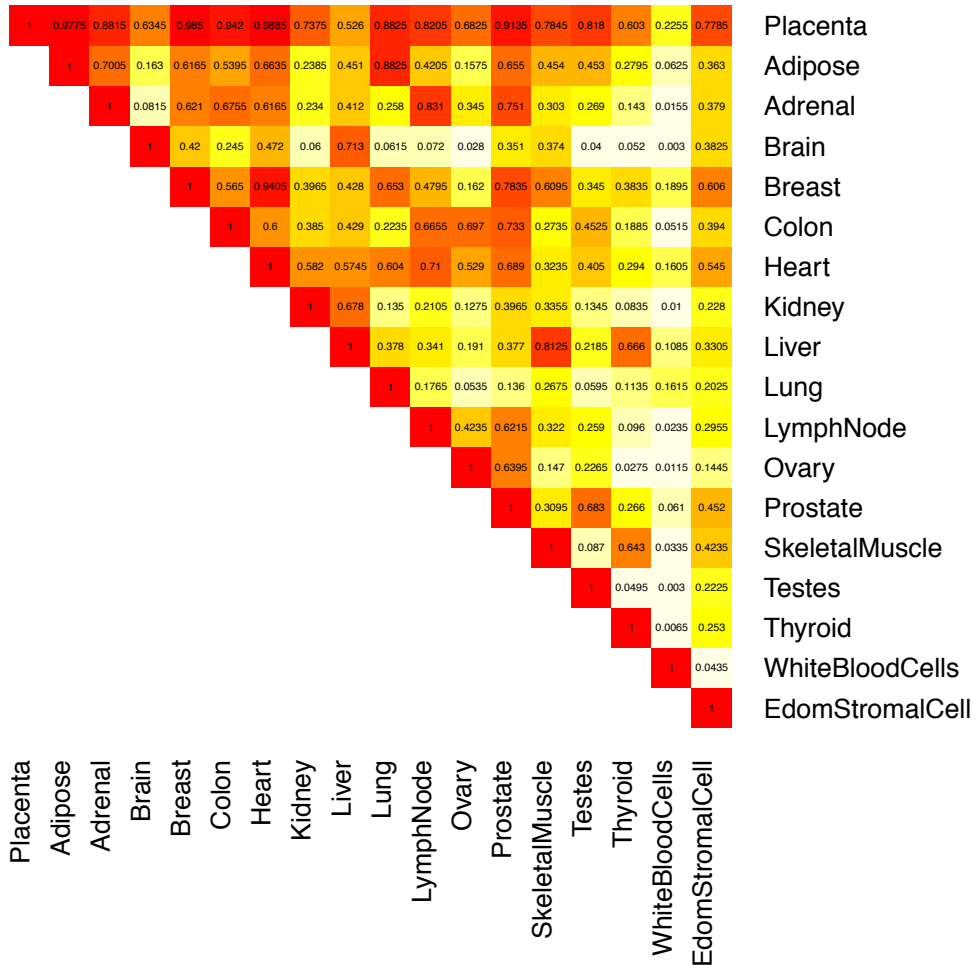

Supplement: supp_evv049_S4_TEPlots_50kb.pdf [file supp_evv049_S4_TEPlots_50kb.pdf]
